# Supplementary material for: Detection and characterization of 3D-signature phosphorylation site motifs and their contribution towards improved phosphorylation site prediction in proteins
Source: Springer Nature journal article supplement (doi:10.1186/1471-2105-10-117), 2009-04-21

**Supplementary Figure 1** Histogram of pairwise sequence comparisons of the 704 protein sequences used in this study. The dataset consisted of highly non-redundant protein sequences as evidenced by the low levels of sequence identities.

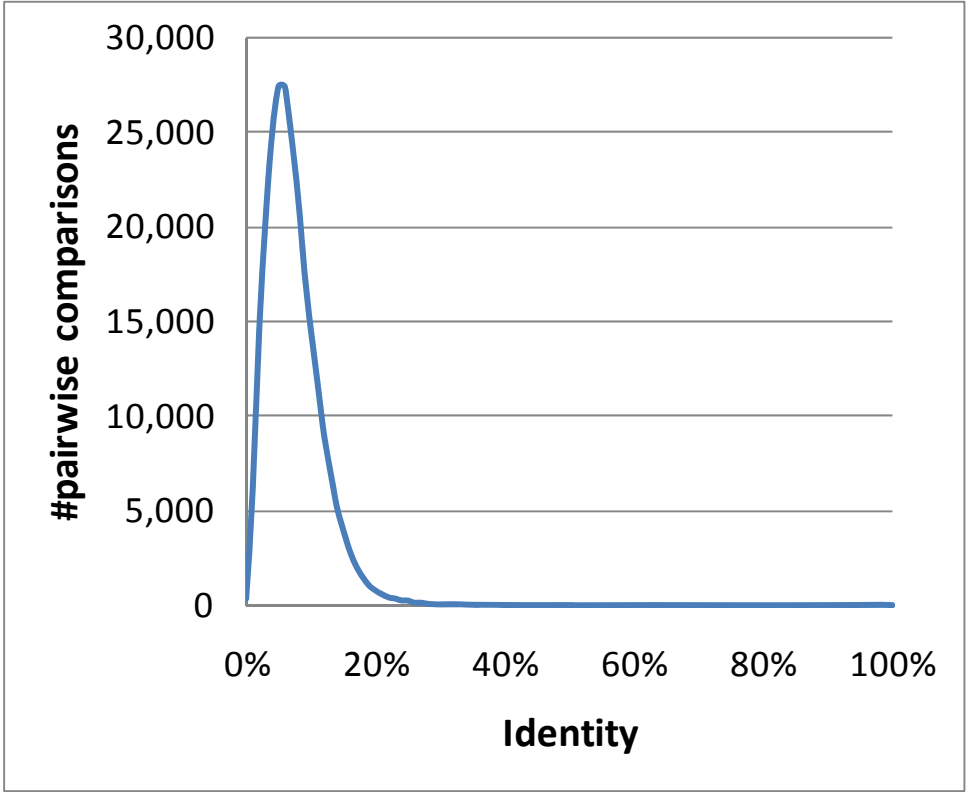

**Supplementary Figure 2.** Comparison of Receiver Operator Characteristics (ROCs) for Phos3D and other commonly used phosphorylation site prediction programs applied to serine, threonine, and tyrosine sites as well as selected kinase-specific sites as indicated in the respective legends.

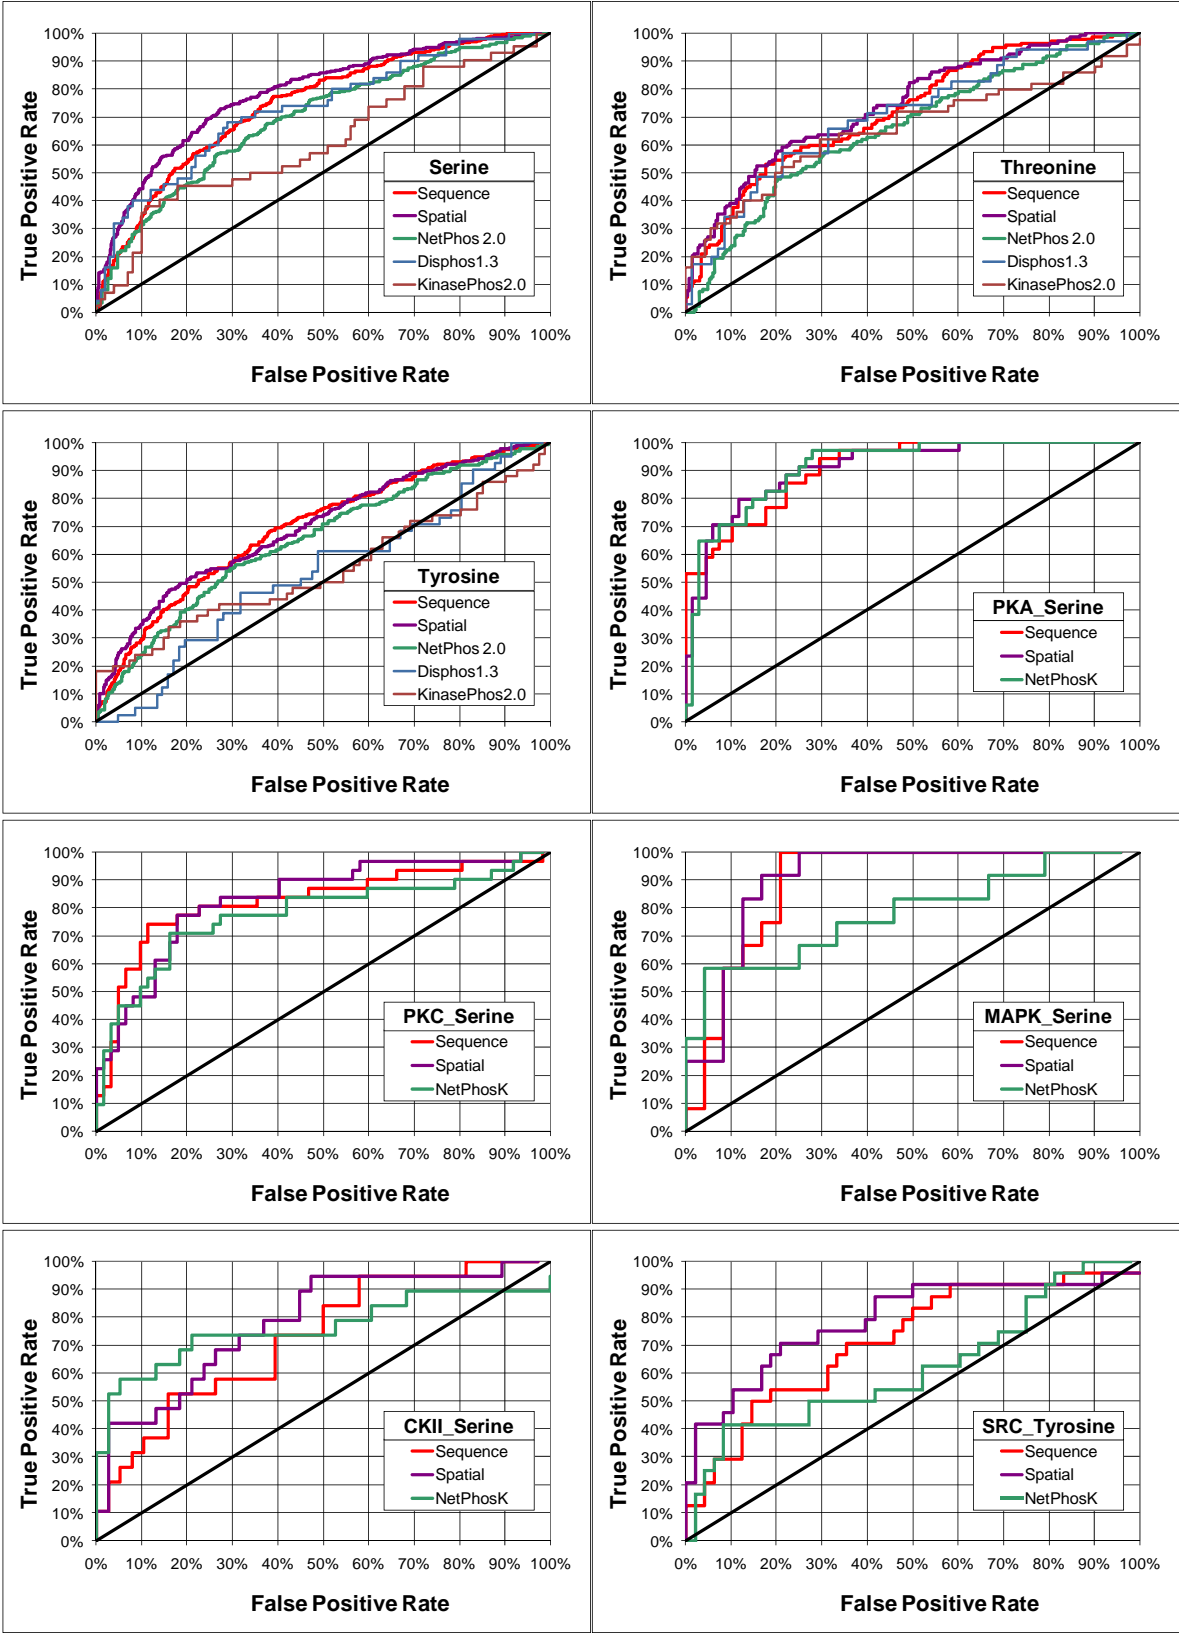

Supplement: 12859_2008_2847_MOESM1_ESM.pdf [file 12859_2008_2847_MOESM1_ESM.pdf]
