# Supplementary material for: Detection and characterization of 3D-signature phosphorylation site motifs and their contribution towards improved phosphorylation site prediction in proteins
Source: Springer Nature journal article supplement (doi:10.1186/1471-2105-10-117), 2009-04-21

Ser

Thr

Tyr

a)

Relative side chain accessibility,  
0=buried, 9=exposed

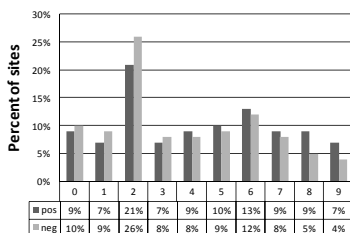

Relative side chain accessibility,  
0=buried, 9=exposed

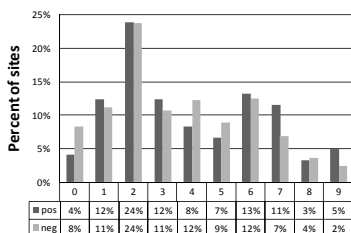

Relative side chain accessibility,  
0=buried, 9=exposed

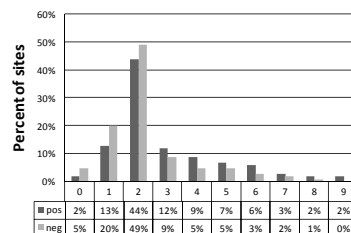

b)

Re-scaled crystallographic B-factors,  
according to pdbfinder annotation

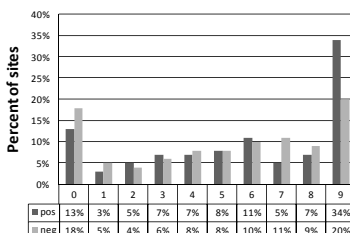

Re-scaled crystallographic B-factors,  
according to pdbfinder annotation

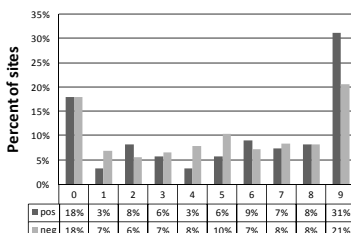

Re-scaled crystallographic B-factors,  
according to pdbfinder annotation

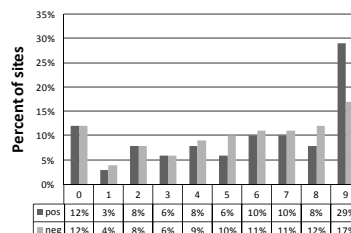

c)

DSSP secondary structure  
according to pdbfinder annotation

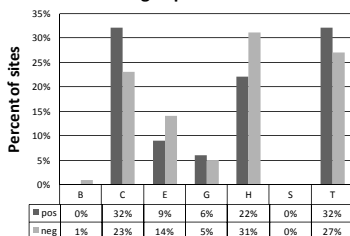

DSSP secondary structure  
according to pdbfinder annotation

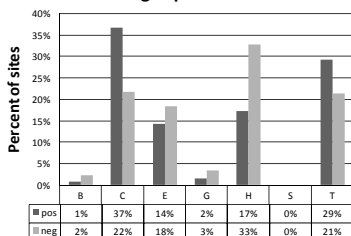

DSSP secondary structure  
according to pdbfinder annotation

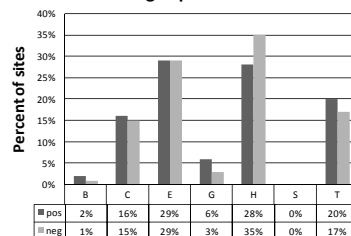

Supplement: 12859_2008_2847_MOESM3_ESM.pdf [file 12859_2008_2847_MOESM3_ESM.pdf]
