# Supplementary material for: Detection and characterization of 3D-signature phosphorylation site motifs and their contribution towards improved phosphorylation site prediction in proteins
Source: Springer Nature journal article supplement (doi:10.1186/1471-2105-10-117), 2009-04-21
Supplement: 12859_2008_2847_MOESM4_ESM.pdf [file 12859_2008_2847_MOESM4_ESM.pdf]

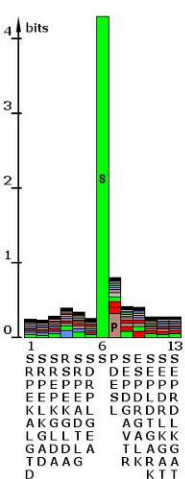

# Ser kinases

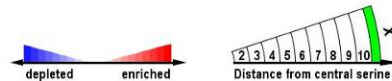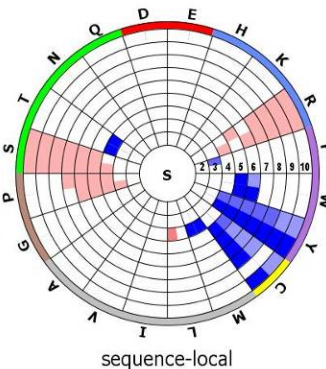

sequence-local

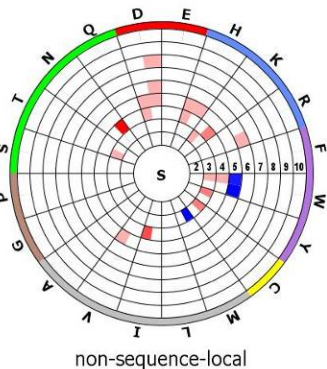

non-sequence-local

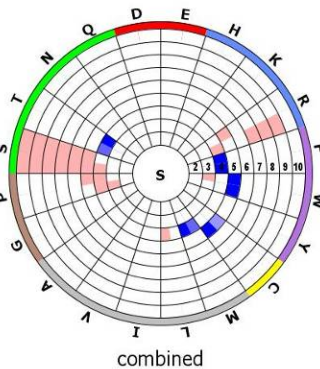

combined

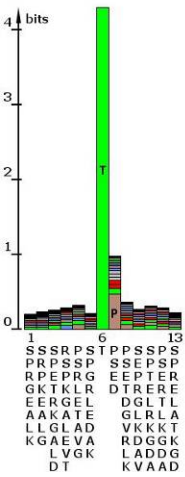

# Thr kinases

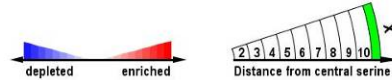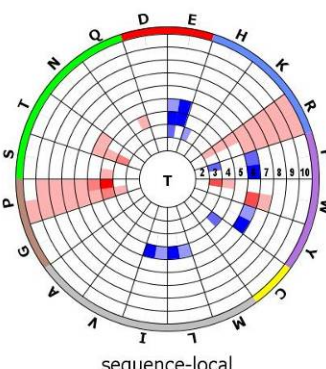

sequence-local

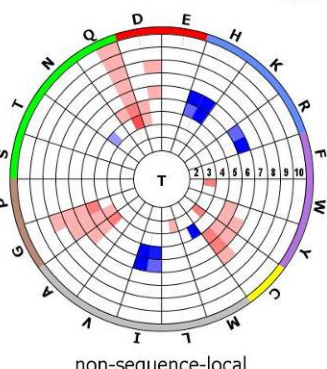

non-sequence-local

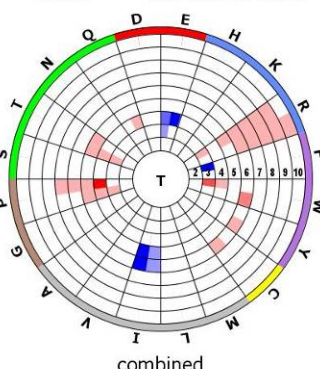

combined

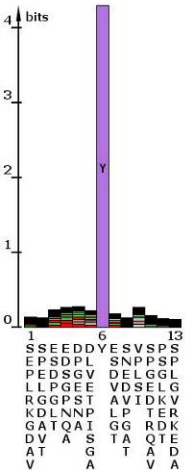

# Tyr kinases

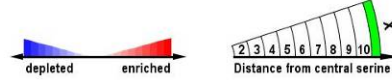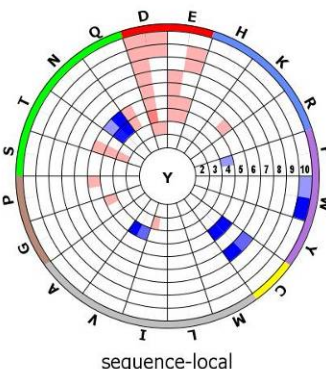

sequence-local

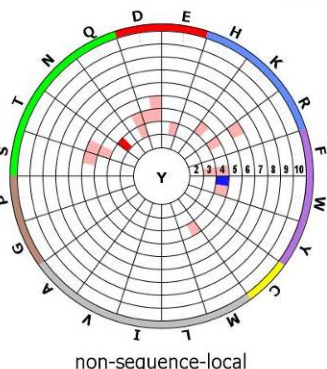

non-sequence-local

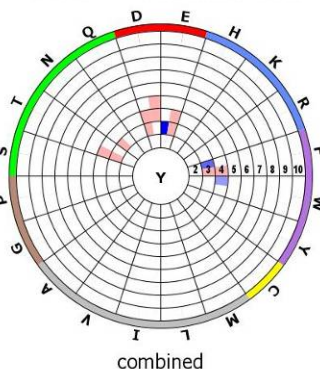

combined
