# Supplementary material for: Detection and characterization of 3D-signature phosphorylation site motifs and their contribution towards improved phosphorylation site prediction in proteins
Source: Springer Nature journal article supplement (doi:10.1186/1471-2105-10-117), 2009-04-21

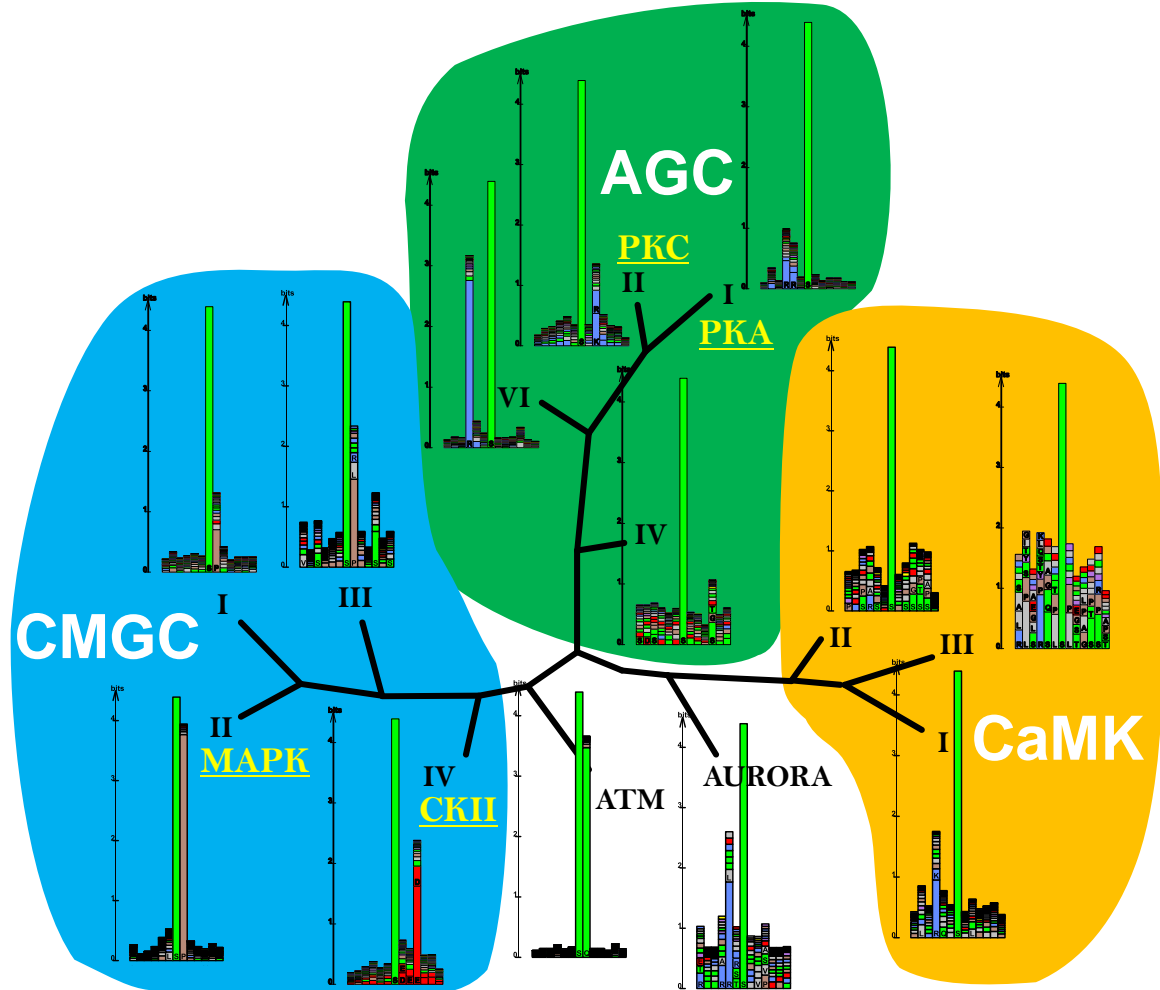

Supplement: 12859_2008_2847_MOESM5_ESM.pdf [file 12859_2008_2847_MOESM5_ESM.pdf]
